# Supplementary material
Source: Springer Nature journal article supplement (https://www.springermedizin.de/resource/supplementary/12875_2013_878_MOESM2_ESM.pdf/9435722)

Percentage distribution of acute admissions in each municipality for patients > 80 years to RS, HSS and nursing homes, annual average 2010-11

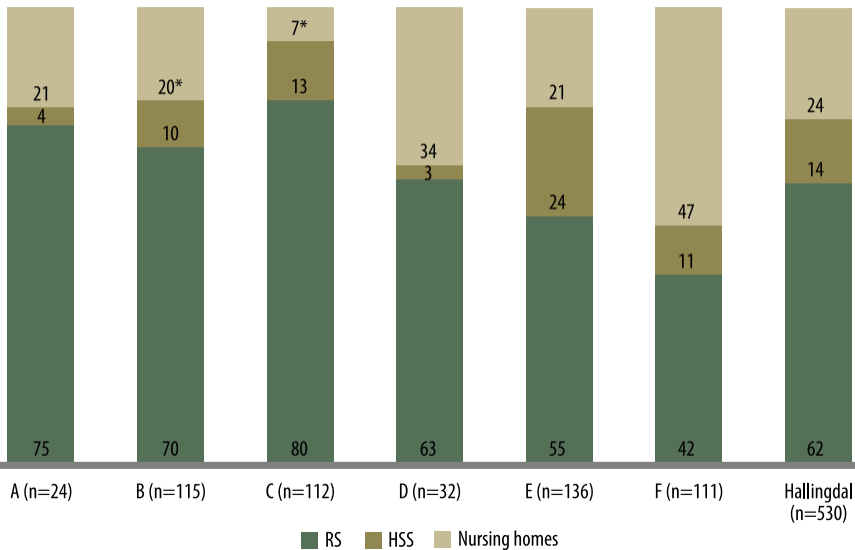

Supplement: MOESM2 [file 9435722]
